1  
2  
3  
4  
5  
6  
7  
8  
9  
10  
11  
12  
13  
14  
15  
16  
17  
18  
19  
20  
21  
22  
23  
24  
25  
26

**Genetically distant bacteriophages elicit unique genomic changes in *Enterococcus faecalis***

Cydney N. Johnson<sup>1,#</sup>, Dennise Palacios Araya<sup>2,#</sup>, Viviane Schink<sup>1</sup>, Moutusee Islam<sup>2</sup>, Mihnea R. Mangalea<sup>1</sup>, Emily K. Decurtis<sup>2</sup>, Tuong-Vi Cindy Ngo<sup>2</sup>, Kelli L. Palmer<sup>2</sup>, Breck A. Duerkop<sup>1,\*</sup>

<sup>1</sup>Department of Immunology and Microbiology, University of Colorado School of Medicine, Aurora, CO, USA, 80045. <sup>2</sup>Department of Biological Sciences, University of Texas at Dallas, Richardson, TX, USA, 75080.

\*Correspondence: Breck A. Duerkop, [breck.duerkop@cuanschutz.edu](mailto:breck.duerkop@cuanschutz.edu)

#C.N.J. and D.P.A. contributed equally to this work

Running title: Genetically distinct phages elicit unique bacterial mutations during coevolution

Key words: Bacteriophages, *Enterococcus faecalis*, coevolution, comparative genomics

27 **ABSTRACT**

28

29 The human microbiota harbors diverse bacterial and bacteriophage (phage) communities.  
30 Bacteria evolve to overcome phage infection, thereby driving phage evolution to counter  
31 bacterial resistance. Understanding how phages promote genetic alterations in medically  
32 relevant bacteria is important as phages continue to become established biologics for the  
33 treatment of multidrug-resistant (MDR) bacterial infections. Before phages are used as  
34 standalone or combination antibacterial therapies, we must obtain a deep understanding of the  
35 molecular mechanisms of phage infection and how host bacteria alter their genomes to become  
36 resistant. We performed coevolution experiments using a single *Enterococcus faecalis* strain  
37 and two distantly related phages, to determine how phage pressure impacts the evolution of the  
38 *E. faecalis* genome. Whole genome sequencing revealed mutations previously demonstrated to  
39 be essential for phage infection. We also identified mutations in several genes previously  
40 unreported to be associated with phage infection in *E. faecalis*. Intriguingly, there was only one  
41 shared mutation in the *E. faecalis* genome in response to each of the two phages tested,  
42 demonstrating that infection by genetically distinct phages results in different host responses.  
43 This study shows that infection of the same host by disparate phages leads to evolutionary  
44 trajectories that result in distinct genetic changes. This implies that bacteria respond to phage  
45 pressure through host responses that are tailored to specific phages. This work serves as the  
46 basis for the study of *E. faecalis* genome evolution during phage infection and will inform the  
47 design of future therapeutics, such as phage cocktails, intended to target MDR *E. faecalis*.

48

49 **IMPORTANCE**

50

51 Studies characterizing the genome evolution of bacterial pathogens following phage selective  
52 pressure are lacking. Phage therapy is experiencing a rebirth in Western medicine. Such

53 studies are critical for understanding how bacteria subvert phage infection and how phages  
54 evolve to counter such mutations. This study utilizes comparative genomic analyses to  
55 demonstrate how a pathogenic strain of *Enterococcus faecalis* responds to infection by two  
56 genetically distant phages. We show that genetic alterations in the *E. faecalis* genome  
57 accumulate in a manner that is specific to the infecting phage with little to no overlap in shared  
58 fixed mutations. This suggests that bacterial genome evolution in response to phage infection is  
59 uniquely tied to phage genotype, and sets a precedence for investigations into how phages  
60 drive bacterial genome evolution relevant to phage therapeutic applications.

61

## 62 **INTRODUCTION**

63

64 *Enterococcus faecalis* is a Gram-positive bacterium naturally residing as a commensal in  
65 the gastrointestinal tracts of animals, including humans (1). Immune suppression and/or  
66 antibiotic treatment can cause *E. faecalis* to outgrow and become the dominant member of the  
67 microbiota, leading to life-threatening opportunistic infections (2). Strains of *E. faecalis* and  
68 *Enterococcus faecium* have acquired traits that allow them to survive host and environmental  
69 stresses, contributing to their success as pathogens (3, 4). The overuse of antibiotics in both  
70 medical and agricultural settings has played a large part in enterococcal pathogenesis by driving  
71 multidrug-resistant (MDR) phenotypes (5, 6). As MDR *E. faecalis* infections continue to persist  
72 worldwide, there is a need to find alternative therapeutics capable of bypassing existing modes  
73 of antibiotic resistance (7-9).

74 Bacterial viruses, bacteriophages (phages), exist in high numbers in the intestinal tract  
75 where they infect and sometimes kill host bacteria, likely influencing the structure of the  
76 microbiota (10-12). Due to their narrow host specificity and ability to lyse bacteria, phages are  
77 becoming an essential resource for the treatment of MDR bacterial infections (13). Phage  
78 therapy offers many advantages over traditional antibiotics. For example, specificity can be

79 tailored to target only the desired bacteria, leaving native microbes largely unaffected (14, 15).  
80 Additionally, phage replication is restricted to the abundance of the host, thus upon host  
81 exhaustion phages are depleted from the population (16). In contrast, conventional antibiotics  
82 lack specificity, killing resident bacteria, and the compounds can remain in the patient after the  
83 infection has cleared (17). There is an ever-growing repertoire of phages that infect *E. faecalis*  
84 (18), making these promising candidates for phage therapy.

85 The development of successful phage therapies will require a complete understanding of  
86 the genetic interactions between phages and bacteria. Although phage therapy holds promise  
87 for the treatment of *E. faecalis* infections (19, 20), the molecular mechanisms of enterococcal  
88 phage infection and the bacterial host response to phage infection are understudied. Phage tail  
89 protein-receptor interactions underpin the molecular basis for phage strain specificity of the  
90 bacterial cell surface (21, 22). To date, only the transmembrane protein PIP<sub>EF</sub> (phage infection  
91 protein of *E. faecalis*) has been identified as a bona fide enterococcal phage receptor (23). Both  
92 phages VPE25 and VFW bind to *E. faecalis* through cell surface polysaccharides, and infection  
93 proceeds following viral DNA entry which requires PIP<sub>EF</sub> (23). Studies in *E. faecium* have  
94 identified cell wall polysaccharides, secreted antigen A, and RNA polymerase to be involved in  
95 phage infection (12, 24). Other studies have identified the enterococcal polysaccharide antigen  
96 (Epa) as a co-receptor for *E. faecalis* phages (25, 26).

97 Bacteria implement various mechanisms, including CRISPR-Cas and restriction-  
98 modification systems to resist phage infection (27). However, spontaneous mutation is the main  
99 mechanism driving both phage resistance and phage-bacteria coevolution (28). Phages must  
100 mutate to counter host mutations and persist in the population; their plastic genomes allow for  
101 the accumulation of adaptive mutations. (29, 30). Although there are numerous studies  
102 evaluating phage mutations during coevolution with laboratory strains of *Escherichia coli*,  
103 studies in medically relevant pathogens such as the enterococci are limited. A recent

104 experiment coevolving *E. faecium* and myophage EfV-phi1 showed that phage tail fiber  
105 mutations helped overcome *E. faecium* phage resistance (12).

106 To further our understanding of phage-enterococcal interactions and their impact on  
107 genome evolution, we co-cultured the MDR *E. faecalis* strain SF28073 with two genetically  
108 distant phages, VPE25 and phage 47 (phi47) (23, 25), for 14 days with daily passaging. Both  
109 phages are long non-contractile tailed siphophages with double-stranded DNA genomes.  
110 Although both phages infect *E. faecalis* strain SF28073, nucleotide alignment revealed that their  
111 genomes only share 37.3% nucleotide identity, indicating they are genetically distinct.  
112 Orthologous protein clustering confirmed that these phages belong to unique enterococcal  
113 phage lineages. Based on these observations, we hypothesized that *E. faecalis* SF28073 may  
114 gain single nucleotide polymorphisms (SNPs) in cellular pathways and macromolecules that are  
115 specific to infection by either phage. To test this hypothesis, we ran two parallel co-culturing  
116 experiments. We show that *E. faecalis* SF28073 evolves unique mutations in response to either  
117 VPE25 or phi47 predation. We identified mutations in known macromolecules previously  
118 demonstrated to be necessary for *E. faecalis* phage infection; however, numerous undescribed  
119 mutations were also identified within a lower percentage of the *E. faecalis* population. Our work  
120 shows that surface associated factors are the major driver of *E. faecalis* phage resistance, yet  
121 genetic alterations emerge that implicate diverse metabolic pathways in the *E. faecalis* response  
122 to phage infection. Additionally, our data suggest that the ratio of phage to bacteria is an  
123 important factor when studying phage-bacterial co-evolution in vitro, as bottlenecks during serial  
124 passage may favor phage extinction.

125

## 126 **MATERIALS AND METHODS**

127

128 **Routine bacterial culture.** *E. faecalis* SF28073 (urine isolate from Michigan, USA) (31) was  
129 cultured in brain heart infusion (BHI, BD) medium at 37°C.

130

131 **Phage isolation and quantification.** Bacteriophages VPE25 (23) and phage 47 (phi47) (25)  
132 were propagated using *E. faecalis* strains V583 (VPE25) or SF28073 (phi47) and phage titers  
133 were quantified by double agar overlay plaque assays, as described previously (23, 25). For  
134 clonal phage isolation, plaques were removed from agar overlays using a sterile p1000 pipette  
135 tip or a glass Pasteur pipette. Agar plugs were suspended in 1mL sterile SM-plus buffer  
136 (100mM NaCl, 50mM Tris-HCl, 8mM MgSO<sub>4</sub>, 5mM CaCl<sub>2</sub> [pH 7.4]) and eluted overnight at 4°C.  
137 The eluted phages were filtered through a 0.45 µm syringe filter and stored at 4°C prior to  
138 phage titer determination by plaque assay.

139

140 **Coevolution assay.** Individual colonies of *E. faecalis* SF28073 were grown overnight. The next  
141 day, 10<sup>8</sup> colony forming units (CFU) of bacteria were inoculated into individual 125 mL flasks  
142 containing 25 mL of BHI broth supplemented with 10mM MgSO<sub>4</sub>. Five flasks were infected with  
143 10<sup>5</sup> plaque forming units (PFU) of phage VPE25 and five flasks with 10<sup>5</sup> PFU of phi47,  
144 originating from individual plaques. Bacteria-only control cultures were included to identify  
145 mutations that arise due to laboratory passage in the absence of phage. All flasks were  
146 incubated at 37°C with shaking at 250 rpm. Every 24 hours, the cultures were passaged by  
147 transferring 250 µL of the culture to flasks containing 25 mL of fresh BHI media supplemented  
148 with 10mM MgSO<sub>4</sub>. At the time of passage, culture aliquots were removed for population DNA  
149 extraction and cryopreservation. For phi47, the culture media was centrifuged and filtered to  
150 isolate phages.

151

152 **DNA extraction for population sequencing.** Genomic DNA was isolated from 1 mL culture  
153 aliquots using a previously described protocol for *E. faecalis* (32). Briefly, samples were treated  
154 with 5 mg/mL lysozyme for 30 minutes at 37°C. 0.5% SDS, 20mM EDTA and 50 µg/mL

155 Proteinase K were added and incubated at 56°C for 1 hour. Samples were cooled to room  
156 temperature before adding an equal volume of phenol/chloroform/isoamyl alcohol and extracted  
157 by shaking. Samples were centrifuged at 17,000 rcf for 1 minute, and the aqueous layer was  
158 extracted with an equal volume of chloroform. Again, samples were centrifuged at 17,000 rcf for  
159 1 minute, and nucleic acids were precipitated from the aqueous layer by adding 0.3M NaOAc  
160 [pH 7] and an equal volume of isopropanol. Nucleic acid was pelleted by centrifuging at 17,000  
161 rcf for 30 minutes at 4°C, washed with 70% ethanol, and centrifuged at 17,000 rcf for 10  
162 minutes. Finally, the pellet was dried and resuspended in sterile water. Genomic DNA was  
163 sequenced using Illumina the NextSeq 2000 platform to 300 Mbp depth at the Microbial  
164 Genome Sequencing Center (MiGS, Pittsburgh, PA, USA).

165

166 **Hybrid assembly of the *E. faecalis* SF28073 genome.** The *E. faecalis* SF28703 genome was  
167 sequenced using Oxford Nanopore technology (ONT) as described previously (33, 34). Briefly,  
168 1.5 µg genomic DNA was mechanically sheared into 8 kb fragments with a Covaris g-tube per  
169 the manufacturer's instructions prior to library preparation with the ONT Ligation Sequencing Kit  
170 1D (SQK-LSK108). Libraries were base called with MinKNOW (v3.5.5) to generate FASTQ and  
171 fast5 sequence reads. Illumina reads were obtained from MiGS as described above. Programs  
172 for DNA sequencing read processing and read assembly were run using the operating system  
173 Ubuntu 18.04.4 LTS. FASTQ sequences were filtered to gather reads with q scores >9 and  
174 length >1000 bp using Nanofilt (v2.5.0) (35). The adaptor sequences were trimmed from the  
175 filtered reads with Porechop (v0.2.3) (<https://github.com/rrwick/Porechop>). The processed  
176 MinION reads were co-assembled with Illumina reads using Unicycler (v0.4.7) with the default  
177 setting "normal mode" (34). Incomplete assemblies were manually completed as described in  
178 the "Unicycler tips for finishing genome" page ([https://github.com/rrwick/Unicycler/wiki/Tips-for-](https://github.com/rrwick/Unicycler/wiki/Tips-for-finishing-genomes)  
179 [finishing-genomes](https://github.com/rrwick/Unicycler/wiki/Tips-for-finishing-genomes)). Briefly, Bandage (v0.8.1) was used to visualize completion status of the  
180 assembly (36), and unassembled contig sequences were extracted. Using these unassembled

181 contig sequences as baits, long reads from MinION sequences were gathered for incomplete  
182 regions using minimap2 (v2.11-r797) and an in-Bandage BLAST search was performed with the  
183 long reads against the graph (37). If long reads supported the continuity of two unassembled  
184 contigs, then the Bandage graph editing function was used to duplicate, delete edge, and merge  
185 contigs. The complete assembly sequence was saved from Bandage in FASTA format.

186

187 **Analysis of serially passaged bacterial populations using Illumina sequencing.** Illumina  
188 reads from the bacterial populations obtained from MiGS were mapped to the assembled *E.*  
189 *faecalis* SF28073 chromosome (GenBank accession number CP060804) and the three  
190 endogenous plasmids (pSF1, CP060801; pSF2, CP060802; and pSF3, CP060803) using CLC  
191 Genomics Workbench with default settings. Detailed read mapping statistics were generated  
192 using the “QC for read mapping” tool in CLC Genomics Workbench with default settings to  
193 obtain the range of coverage and zero coverage regions in each assembly. The “Find low  
194 coverage” tool in CLC Genomics Workbench with the low coverage threshold set at 0 was used  
195 to manually inspect the regions found by the quality analysis to contain regions with 0 coverage.  
196 Sequence variants were identified using the “Basic variant detection” tool with a minimum  
197 coverage of 100, minimum frequency of 30%, and ploidy of 0. All variants identified were  
198 manually examined, and silent mutations were excluded from the analysis. Variants present in  
199 the bacteria-only controls were also excluded from further analysis.

200

201 **Phage 47 genome sequencing and analysis.** Phi47 genomic DNA was isolated following the  
202 methods described above. A draft wild type phi47 genome was assembled *de novo* from  
203 Illumina reads obtained from MiGS, with the largest contig forming the full genome. RAST  
204 genome annotation (v2.0) was used to predict gene function (38). During coevolution with *E.*  
205 *faecalis* SF28073, culture media was filtered through a 0.45- $\mu$ m filter. DNA was extracted from  
206 filtered media using the proteinase K and phenol/chloroform method described above and



207 sequenced using Illumina technology at MiGS. These reads were mapped to the wild type phi47  
208 genome and SNPs were identified using CLC Genomic Workbench with a minimum coverage of  
209 10, a minimum frequency of 30%, and ploidy of 0.

210  
211 **OrthoMCL analysis.** Enterococcal phage phylogeny was determined using OrthoMCL (39) as  
212 described previously (24). Enterococcal phage genomes were downloaded from the INPHARED  
213 phage genome database (18). As of July 1, 2021, there were 126 enterococcal phage genome  
214 sequences available in addition to our inclusion of the phi47 genome. Proteomes determined  
215 using Prodigal (40) were used as input into an OrthoMCL MySQL database. A cluster inflation  
216 value of 1.5 was used and the resulting matrix was input for gg dendro and ggplot2 packages in  
217 R version 3.6.3. The dendrogram was determined using the average linkage method for  
218 hierarchical clustering of Manhattan distance metrics.

219  
220 **Data Availability.** The *E. faecalis* SF28073 chromosome and its three endogenous plasmids  
221 can be in the NCBI database under the following accession numbers; *E. faecalis* SF28073  
222 chromosome (CP060804), *E. faecalis* SF28073 plasmids (pSF1, CP060801; pSF2, CP060802;  
223 and pSF3, CP060803). Illumina DNA sequencing reads associated with this study are deposited  
224 at the European Nucleotide Archive under accession number PRJEB48380.

225

## 226 **RESULTS**

227

### 228 **Phi47 and VPE25 phages are genetically distinct.**

229 phi47 depends on the enterococcal polysaccharide antigen (Epa) for adsorption to host  
230 cells (25). The phi47 genome is 57,289 base pairs in length, consisting of 101 predicted open  
231 reading frames (ORFs). Using RAST genome annotation (38), we characterized the phi47  
232 genome based on functional classifications (Fig. 1A). The genome exhibits typical modularity;

233 meaning that tail, structural, and DNA replication genes are in proximity to genes of similar  
234 function. The remainder, and the majority of the genes, are predicted to be hypothetical.

235         Phi47 and VPE25 are both siphoviruses belonging to the class *Caudoviricetes* (23, 25,  
236 41). However, these phages differ in host range and genome content. VPE25 is a virulent phage  
237 capable of infecting numerous *E. faecalis* strains (23), including SF28073, while phi47 primarily  
238 infects SF28073 (25). Comparative genomic analysis of phi47 was performed with all publicly  
239 available enterococcal phage genomes using OrthoMCL (Fig. 1B) (18). This algorithm  
240 generates a phylogenetic tree of clustered phage genomes (orthoclusters) based on  
241 orthologous proteins (24, 39, 42). Of the 12 known orthoclusters (24, 42), phi47 belongs to  
242 cluster III, while VPE25 is in cluster X. Further analysis of orthocluster II resulted in its division  
243 into two unique orthoclusters bringing the total to 13 orthoclusters of enterococcal phages (Fig  
244 1B). EasyFig comparison of the phage genomes revealed only three shared genes (gray lines,  
245 Fig. 1C) (43). These genes exhibit 67% or greater identity at the nucleotide level. Together,  
246 these genetic analyses demonstrate the lack of common genes between phages VPE25 and  
247 phi47, making them genetically distinct.

248

249 **Phage infection of *E. faecalis* promotes mutations in cell wall macromolecules necessary**  
250 **for phage infection, and unique mutations accumulate in a phage-dependent manner.**

251 To identify bacterial mutations that confer phage resistance in *E. faecalis* SF28073, we  
252 conducted two independent coevolution experiments, infecting five replicate SF28073 cultures  
253 with phages derived from individual plaques of either phage VPE25 or phi47, and passaged  
254 these cultures for 14 consecutive days. Bacteria-only controls were established and treated  
255 under identical conditions in the absence of phage infection. Genomic DNA from the bacterial  
256 populations were sequenced from each replicate at five time points (days 0, 1, 3, 7 and 14). To  
257 identify mutations in the SF28073 genome, sequencing reads were mapped to the closed *E.*  
258 *faecalis* SF28073 reference genome generated in this study by hybrid assembly of Illumina and

259 Oxford Nanopore MinION sequencing reads. The assembled SF28073 genome consists of the  
260 chromosome and three endogenous plasmids designated pSF1, pSF2, and pSF3 (GenBank  
261 accession numbers CP060804, CP060801, CP060802, and CP060803, respectively).

262 Non-synonymous, unique bacterial single nucleotide polymorphisms (SNPs) were  
263 observed in all experimental replicates, except in one of the VPE25-challenged replicates where  
264 the mutation frequencies were below our 30% population-wide cutoff. Interestingly, the  
265 mutations that arose in *E. faecalis* SF28073 challenged with phage VPE25 largely differed from  
266 mutations in *E. faecalis* SF28073 challenged with phi47. As expected, we observed mutations in  
267 PIP<sub>EF</sub> at one or more time points in all of the VPE25 challenged replicates, except the culture  
268 mentioned above which did not meet our read mapping cutoff (Table S1). We detected *epa*  
269 mutations in 4 of the cultures infected with phi47 (Table S2). These two macromolecules have  
270 been previously reported to be essential for successful infection of these phages; the integral  
271 membrane protein PIP<sub>EF</sub> is the receptor for VPE25, while both VPE25 and phi47 rely on the  
272 enterococcal polysaccharide antigen (Epa) for adsorption (23, 25, 44).

273 We identified *ccpA* as the only common gene mutated when SF28073 was challenged  
274 with either VPE25 or phi47 (Table 1, 2). When exposed to phage VPE25, *ccpA* had mutations in  
275 two replicates which appeared at different time points (days 7 and 14, Table S1), while  
276 exposure to phi47 resulted in one replicate harboring a *ccpA* mutation on day 14 (Table S2). In  
277 *E. faecalis*, catabolite control protein A (CcpA) plays a key role in regulating transcription of  
278 proteins involved in carbon source utilization (45). Moreover, both experimental groups had  
279 mutations arise in different components of the SUF system, which is involved in the iron-sulfur  
280 (Fe-S) cluster assembly pathway (46) (Table S1, S2). One VPE25-challenged replicate had a  
281 mutation in *sufU*, encoding a sulfur relay protein (46), while one phi47-challenged replicate had  
282 a mutation in *sufD*. Both mutations were identified on day 7 and were maintained to day 14. This  
283 suggests that both phages may utilize bacterial iron-sulfur complexes during infection.

284 A mutation in the mannose-permease encoding gene *manX* was found in one replicate  
285 infected with phage VPE25. In a previous study, mutations in *E. coli* subunits of the ManXYZ  
286 mannose-permease were mutated after infection with phage Lambda. This component of the  
287 phosphotransferase system is known to be used by phage Lambda to eject its DNA (29),  
288 suggesting that phage VPE25 may implement a similar infection mechanism by interacting with  
289 the mannose phosphotransferase system to infect *E. faecalis* SF28073.

290 Additionally, one replicate challenged with phage VPE25 had mutations in a putative  
291 restriction-modification (R-M) system, located within the two specificity (S) subunit genes,  
292 specifically genes H9Q64\_13860 and H9Q64\_13845 (Table S1). In R-M systems, the S subunit  
293 genes, composed of two target recognition domains, recognize specific DNA sequences thereby  
294 providing target specificity to the R-M complex (47). On day 7, both subunits shared missense  
295 mutations resulting in amino acid changes from leucine to phenylalanine and lysine to  
296 glutamine. Surprisingly, on day 14 these mutations were no longer detected, suggesting that  
297 they rendered these cells less fit in the population. Other missense mutations specific to each S  
298 subunit gene were also found on day 7. These two mutations were observed again on day 14 at  
299 higher frequencies, which on the contrary, suggest that these mutations provided a fitness  
300 advantage to the population. Lastly, day 14 revealed two additional mutations in both S subunits  
301 that were not present on day 7. The numerous amino acid changes observed across the S  
302 subunits of the R-M system suggests these mutations may be increasing the specificity of the  
303 subunit S towards recognizing the VPE25 genome.

304 When *E. faecalis* SF28073 coevolved with phi47, we observed three genes mutated  
305 across multiple replicates (Table 2). H9Q64\_01755, a predicted transposase, was mutated in  
306 two replicates. In fact, both replicates had the same mutation arginine 144 to leucine.  
307 H9Q64\_09795 was also mutated in two replicates. This gene, *epaAC*, is a predicted  
308 epimerase/dehydratase (48). Lastly, H9Q64\_09850 was mutated in three replicates. This gene  
309 is *epaR*, the final gene in the rhamnose-sugar biosynthesis locus of *epa* that is a predicted

310 priming glycosyltransferase (48). Epa is involved in phage adsorption (25, 26), making this gene  
311 essential for successful phi47 infection.

312

### 313 **Phi47 co-evolves mutations in tail and hypothetical genes.**

314 During the 14 days of passaging, we enumerated both phi47 and *E. faecalis* SF28073 to  
315 determine the population kinetics for each experimental replicate (Fig. 2). We observed different  
316 phage abundance patterns across the five replicates, despite each being treated identically.  
317 While all replicates had an expected spike in phi47 titer on day 1 after 24 hours of replication in  
318 a completely susceptible population, and a reduction in titer on day 3, phage abundance differed  
319 for each replicate on day 7 (Fig. 2). Culture 1 phi47 titer spiked and was followed by a  
320 continuous decline until phi47 was no longer detectable in the culture via plaque assay by day  
321 11. Cultures 2 and 3 had no detectable phi47 on day 7 and became extinct. Cultures 4 and 5  
322 had low phage titers on day 7. Culture 4 had a phi47 spike on day 9 followed by a decline until it  
323 was no longer detected on day 12, and phi47 went extinct in culture 5 by day 9.

324 Due to the differences observed in phi47 abundance over the course of these  
325 experiments, we sequenced the phage population of each replicate on days 0, 1, 3, and 7. Day  
326 14 was excluded from analysis because no replicate had phage detectable by plaque assay at  
327 that time point. Sequencing of phage DNA revealed that each culture had a unique mutation  
328 profile. Phages from cultures 2 and 3 acquired the most SNPs, but viable phages were  
329 undetectable at day 7, suggesting that these acquired mutations in various tail and hypothetical  
330 proteins may have been deleterious to the phages' ability to overcome bacterial resistance  
331 mutations. Phages from cultures 3 and 4 developed identical tail SNPs on day 7. While there  
332 were no infectious phages detectable by plaque assay in culture 3 on day 7, we were still able  
333 to recover phage DNA in culture media, allowing us to perform genetic analyses. Culture 5  
334 phages only developed one SNP in a minor structural protein on day 3, which was maintained  
335 on day 7. Culture 1 phages developed no SNPs. Interestingly, there are three hypothetical

336 genes that are mutated in phages across multiple cultures (Table S3). Despite the different  
337 mutations observed across replicates, phi47 was not detectable in any of the cultures by the  
338 end of the passaging, indicating that these phages were unable to subvert phage resistance  
339 leading to their extinction.

340

## 341 **DISCUSSION**

342

343 *E. faecalis* is a commensal and nosocomial pathogen, and is becoming increasingly  
344 resistant to last resort antibiotics (49). In this study, we show the coevolution of *E. faecalis*  
345 SF28073 with two genetically distinct phages, VPE25 and phi47. Our results reveal that the *E.*  
346 *faecalis* genome mutates in distinct patterns in response to each phage. This indicates that  
347 genetically unique phages elicit distinct genetic responses within the same host. In particular, for  
348 both phages, *E. faecalis* developed missense mutations in cell wall macromolecules, specifically  
349 PIP<sub>EF</sub> and Epa, that are required for successful infection by VPE25 and phi47, respectively (23,  
350 25). VPE25 has recently been shown to depend on Epa (44), most likely for adsorption to the  
351 cells. Because PIP<sub>EF</sub> and Epa are essential for successful phage infection, mutations in these  
352 genes prevent phage infection. Despite this, we observed no *epa* mutations in cultures  
353 challenged with VPE25, suggesting that PIP<sub>EF</sub> mutations are dominant and potentially more  
354 advantageous than *epa* mutations, likely due to the fitness costs caused by *epa* mutations (25,  
355 26). SNPs in *pip<sub>EF</sub>* and *epa* indicate that across bacterial species, phage receptor and co-  
356 receptor mutations are common to prevent phage infection.

357 Mutations in *ccpA* were found in cultures challenged with both VPE25 and phi47. In  
358 Gram-positive bacteria, CcpA regulates the expression of genes encoding proteins involved in  
359 the catabolism of complex carbon sources when more rapidly metabolized carbohydrates such  
360 as glucose or fructose are present (45, 50). Phage infection outcome is determined by the  
361 bacterial host physiological condition (51). For instance, type of carbon source present in the

362 bacterial host's media affects phage development and their ability to lyse the cells (51, 52). It is  
363 possible that mutations in *ccpA* could impact bacterial carbon source utilization, allowing the  
364 bacteria to switch to using carbohydrates less preferred by the phages, therefore negatively  
365 impacting phage production. Furthermore, Chatterjee et al. showed that RNA sequencing of  
366 OG1RF\_10887 was over-expressed early during VPE25 infection (44). Here, we observed  
367 mutations in the SF28073 iron-sulfur binding genes *sufD* and *sufU* during phi47 and VPE25  
368 infection, respectively. These two studies suggest that iron-sulfur binding proteins are critical  
369 during lytic phage infection.

370         Recent work in *E. coli* has revealed mutations in OmpF (a phage Lambda receptor) and  
371 in subunits of the *manXYZ* mannose permease operon, both of which phage Lambda uses for  
372 DNA ejection into the host cytoplasm. We discovered a mutation in the mannose permease  
373 gene *manX*, a component of the mannose phosphotransferase system, in one of our cultures  
374 infected with phage VPE25, suggesting that phage VPE25 could also utilize a similar infection  
375 process by interacting with the mannose phosphotransferase system to infect *E. faecalis*.

376         Additionally, we show that phi47, an understudied enterococcal phage, develops  
377 mutations during co-culture with its host. Phages from cultures 3 and 4 developed identical  
378 mutations in the major tail protein on day 7. However, culture 3 had no phages detectable by  
379 plaque assay on that day, suggesting that these phages were unable to overcome the bacterial  
380 mutations in cell wall associated macromolecules, such as Epa. Phages in culture 4 developed  
381 the same major tail protein mutations before the bacteria developed *epa* locus mutations,  
382 suggesting that the major tail protein mutations arose independent of host *epa* mutations.  
383 Despite these novel mutations, phi47 could not be maintained in the experimental cultures.

384         While there is currently only one paper investigating phage and *Enterococcus*  
385 coevolution (12), there are numerous coevolution studies between the model organism *E. coli*  
386 and its phages. In one study *E. coli* and phage T3 were coevolved in chemostats, allowing for a  
387 controlled experimental environment. Under this condition, the authors observed common

388 bacterial mutations at the gene level and phage mutations at the codon level across  
389 experimental replicates (53). We believe that our current study both supports and contradicts  
390 these findings. In our study, four of the five cultures challenged with phage VPE25 developed  
391 mutations in PIP<sub>EF</sub>. This maintains the conclusion that bacterial mutations in response to phage  
392 pressure reproducibly occur at the gene level. However, cultures challenged with phi47 showed  
393 more variability among *E. faecalis* genomic mutations across replicates. While phi47 developed  
394 some mutations that were shared across multiple cultures, each culture had a unique phage  
395 SNP profile, which are at odds with Perry et al. that phage mutations replicate at the codon  
396 level. It is possible that these outcomes may depend on the phage-host bacterial pair used in  
397 coevolution experiments, the specific MOI used to initially infect the cultures, and the growth  
398 conditions tested.

399       Ultimately, the study by Perry et al. suggests that lack of reproducibility in coevolution  
400 experiments may be due to abiotic selection pressures, meaning that divergence among  
401 experimental replicates can increase via random events occurring in each population over time.  
402 This argues for a more controlled and consistent experimental design, such as a chemostat for  
403 continuous culturing, that may reduce stochastic events. We believe that our experimental  
404 design, which included manual daily sub-culturing, may have introduced bottlenecks causing a  
405 selection bias for the growth and preservation of bacteria, while causing phages to disappear  
406 from the population. In our experiments, we initially inoculated each flask with  $\sim 10^8$  CFU of *E.*  
407 *faecalis* SF28073 and  $\sim 10^5$  PFU of phage (MOI 0.001). A similar ratio (MOI 0.003) that was  
408 used to study phage-*E. faecium* coevolution (53). However, for the *E. faecium* study, passaging  
409 was performed at a 1:10 ratio, transferring every 12 hours for a total of 16 time, while we  
410 implemented a passage ratio of 1:100, transferring every 24 hours for 14 days.

411       A study in *E. coil* used a chemostat with an MOI of 2, showing that in this setting  
412 coevolution happened in the form of adaptation and counter-adaptation (54). While we began to  
413 observe phage extinction by day 7, the phage population from Wandro et al. was maintained in



414 all cultures throughout the course of the experiment. We speculate that the small volume we  
415 sub-cultured, the low starting MOI, and the fact that there were magnitudes more bacterial cells  
416 than phage in the population, may have caused a significant decrease in the number of phages  
417 passaged, thus introducing a bottleneck that ultimately eliminated the phage from the  
418 population. Additionally, our 24-hour passages may have allowed extra time for bacteria to grow  
419 and continue mutating to resist phage infection.

420 Our study highlights the importance of carefully considering experimental design factors  
421 such as MOI and sub culturing methods when studying the coevolution of phages and their  
422 hosts to prevent the introduction of bottlenecks. Studies such as transposon-insertion  
423 sequencing used to investigate genes involved in infection can be confounded by the presence  
424 of bottlenecks that can limit the quality of the library (55). Furthermore, bottlenecks could  
425 prevent the discovery of novel genes involved in phage infection by limiting the survival of the  
426 phage in the population. Future studies should consider our methods and modify them to  
427 support continuous phage replication—for instance, using higher volumes if manually  
428 passaging, implementing a higher starting MOI, and the use of continuous culturing systems.

429

#### 430 **ACKNOWLEDGEMENTS**

431

432 This work was supported by National Institutes of Health grants R01AI141479 (B.A.D.),  
433 R01AI116610 (K.L.P.), T32AI052066 (C.N.J.), F31AI157050 (C.N.J.), and T32AR007534  
434 (M.R.M.).

435

#### 436 **REFERENCES**

437

438 1. Lebreton F, Willems RJL, Gilmore MS. 2014. Enterococcus Diversity, Origins in Nature,  
439 and Gut Colonization. *In* Gilmore MS, Clewell DB, Ike Y, Shankar N (ed), Enterococci:

- 440 From commensals to leading causes of drug resistant infection. Massachusetts Eye and  
441 Ear Infirmary, Boston.
- 442 2. Ubeda C, Taur Y, Jenq RR, Equinda MJ, Son T, Samstein M, Viale A, Succi ND, van  
443 den Brink MR, Kamboj M, Pamer EG. 2010. Vancomycin-resistant *Enterococcus*  
444 domination of intestinal microbiota is enabled by antibiotic treatment in mice and  
445 precedes bloodstream invasion in humans. J Clin Invest 120:4332-41.  
446 doi:10.1172/jci43918.
- 447 3. Lebreton F, Manson AL, Saavedra JT, Straub TJ, Earl AM, Gilmore MS. 2017. Tracing  
448 the enterococci from Paleozoic origins to the hospital. Cell 169:849-861.e13.  
449 doi:10.1016/j.cell.2017.04.027.
- 450 4. Tyne DV, Gilmore MS. 2014. Friend turned foe: Evolution of enterococcal virulence and  
451 antibiotic resistance. Annu Rev Microbiol 68:337-356. doi:10.1146/annurev-micro-  
452 091213-113003.
- 453 5. Gawryszewska I, Żabicka D, Hryniewicz W, Sadowy E. 2017. Linezolid-resistant  
454 enterococci in Polish hospitals: Species, clonality and determinants of linezolid  
455 resistance. Eur J Clin Microbiol Infect Dis 36:1279-1286. doi:10.1007/s10096-017-2934-  
456 7.
- 457 6. Munoz-Price LS, Lolans K, Quinn JP. 2005. Emergence of resistance to daptomycin  
458 during treatment of vancomycin-resistant *Enterococcus faecalis* infection. Clin Infect Dis  
459 41:565-566. doi:10.1086/432121.
- 460 7. Esmail MAM, Abdulghany HM, Khairy RM. 2019. Prevalence of multidrug-resistant  
461 *Enterococcus faecalis* in hospital-acquired surgical wound infections and bacteremia:

- 462 Concomitant analysis of antimicrobial resistance genes. *Infect Dis (Auckl)*  
463 12:1178633719882929. doi:10.1177/1178633719882929.
- 464 8. Farman M, Yasir M, Al-Hindi RR, Farraj SA, Jiman-Fatani AA, Alawi M, Azhar EI. 2019.  
465 Genomic analysis of multidrug-resistant clinical *Enterococcus faecalis* isolates for  
466 antimicrobial resistance genes and virulence factors from the western region of Saudi  
467 Arabia. *Antimicrob Resist Infect Control* 8:55. doi:10.1186/s13756-019-0508-4.
- 468 9. Remschmidt C, Schröder C, Behnke M, Gastmeier P, Geffers C, Kramer TS. 2018.  
469 Continuous increase of vancomycin resistance in enterococci causing nosocomial  
470 infections in Germany – 10 years of surveillance. *Antimicrob Resist Infect Control* 7:54.  
471 doi:10.1186/s13756-018-0353-x.
- 472 10. Mangalea MR, Paez-Espino D, Kieft K, Chatterjee A, Chriswell ME, Seifert JA, Feser  
473 ML, Demoruelle MK, Sakatos A, Anantharaman K, Deane KD, Kuhn KA, Holers VM,  
474 Duerkop BA. 2021. Individuals at risk for rheumatoid arthritis harbor differential intestinal  
475 bacteriophage communities with distinct metabolic potential. *Cell Host Microbe* 29:726-  
476 739.e5. doi:10.1016/j.chom.2021.03.020.
- 477 11. Minot S, Bryson A, Chehoud C, Wu GD, Lewis JD, Bushman FD. 2013. Rapid evolution  
478 of the human gut virome. *Proc Natl Acad Sci U S A* 110:12450-12455.  
479 doi:10.1073/pnas.1300833110.
- 480 12. Wandro S, Oliver A, Gallagher T, Weihe C, England W, Martiny JBH, Whiteson K. 2019.  
481 Predictable molecular adaptation of coevolving *Enterococcus faecium* and lytic phage  
482 EfV12-phi1. *Front Microbiol* 9. doi:10.3389/fmicb.2018.03192.

- 483 13. Kortright KE, Chan BK, Koff JL, Turner PE. 2019. Phage therapy: A renewed approach  
484 to combat antibiotic-resistant bacteria. *Cell Host Microbe* 25:219-232.  
485 doi:10.1016/j.chom.2019.01.014.
- 486 14. Brives C, Pourraz J. 2020. Phage therapy as a potential solution in the fight against  
487 AMR: obstacles and possible futures. *Palgrave Communications* 6:100.  
488 doi:10.1057/s41599-020-0478-4.
- 489 15. Sulakvelidze A, Alavidze Z, Morris JG. 2001. Bacteriophage therapy. *Antimicrob Agents*  
490 *Chemother* 45:649-659. doi:doi:10.1128/AAC.45.3.649-659.2001.
- 491 16. Moelling K, Broecker F, Willy C. 2018. A wake-up call: We need phage therapy now.  
492 *Viruses* 10:688.
- 493 17. Langdon A, Crook N, Dantas G. 2016. The effects of antibiotics on the microbiome  
494 throughout development and alternative approaches for therapeutic modulation.  
495 *Genome Med* 8:39. doi:10.1186/s13073-016-0294-z.
- 496 18. Cook R, Brown N, Redgwell T, Rihtman B, Barnes M, Clokie M, Stekel DJ, Hobman J,  
497 Jones MA, Millard A. 2021. Infrastructure for a PHAge REference Database:  
498 Identification of large-scale biases in the current collection of phage genomes. bioRxiv  
499 doi:10.1101/2021.05.01.442102. doi:10.1101/2021.05.01.442102.
- 500 19. Gelman D, Beyth S, Lerer V, Adler K, Poradosu-Cohen R, Copenhagen-Glazer S,  
501 Hazan R. 2018. Combined bacteriophages and antibiotics as an efficient therapy against  
502 VRE *Enterococcus faecalis* in a mouse model. *Res Microbiol* 169:531-539.  
503 doi:10.1016/j.resmic.2018.04.008.

- 504 20. Khalifa L, Brosh Y, Gelman D, Copenhagen-Glazer S, Beyth S, Poradosu-Cohen R,  
505 Que Y-A, Beyth N, Hazan R, Drake HL. 2015. Targeting *Enterococcus faecalis* biofilms  
506 with phage therapy. *Appl Environ Microbiol* 81:2696-2705. doi:doi:10.1128/AEM.00096-  
507 15.
- 508 21. Kabanova AP, Shneider MM, Korzhenkov AA, Bugaeva EN, Miroshnikov KK,  
509 Zdrovenko EL, Kulikov EE, Toschakov SV, Ignatov AN, Knirel YA, Miroshnikov KA.  
510 2019. Host specificity of the *Dickeya* bacteriophage PP35 is directed by a tail spike  
511 interaction with bacterial O-antigen, enabling the infection of alternative non-pathogenic  
512 bacterial host. *Front Microbiol* 9. doi:10.3389/fmicb.2018.03288.
- 513 22. Tu J, Park T, Morado DR, Hughes KT, Molineux IJ, Liu J. 2017. Dual host specificity of  
514 phage SP6 is facilitated by tailspike rotation. *Virology* 507:206-215.  
515 doi:10.1016/j.virol.2017.04.017.
- 516 23. Duerkop BA, Huo W, Bhardwaj P, Palmer KL, Hooper LV. 2016. Molecular basis for lytic  
517 bacteriophage resistance in enterococci. *mBio* 7:e01304-16.  
518 doi:doi:10.1128/mBio.01304-16.
- 519 24. Canfield GS, Chatterjee A, Espinosa J, Mangalea MR, Sheriff EK, Keidan M, McBride  
520 SW, McCollister BD, Hang HC, Duerkop BA. 2021. Lytic bacteriophages facilitate  
521 antibiotic sensitization of *Enterococcus faecium*. *Antimicrob Agents Chemother*  
522 65:e00143-21. doi:doi:10.1128/AAC.00143-21.
- 523 25. Chatterjee A, Johnson CN, Luong P, Hullahalli K, McBride SW, Schubert AM, Palmer  
524 KL, Carlson PE, Jr., Duerkop BA. 2019. Bacteriophage resistance alters antibiotic-  
525 mediated intestinal expansion of enterococci. *Infect Immun* 87. doi:10.1128/iai.00085-19.

- 526 26. Ho K, Huo W, Pas S, Dao R, Palmer KL. 2018. Loss-of-function mutations in *epaR*  
527 confer resistance to  $\square$ NPV1 infection in *Enterococcus faecalis* OG1RF. Antimicrob  
528 Agents Chemother 62:e00758-18. doi:doi:10.1128/AAC.00758-18.
- 529 27. Dupuis M, Villion M, Magadán AH, Moineau S. 2013. CRISPR-Cas and restriction-  
530 modification systems are compatible and increase phage resistance. Nat Commun  
531 4:2087. doi:10.1038/ncomms3087.
- 532 28. Oechslin F. 2018. Resistance development to bacteriophages occurring during  
533 bacteriophage therapy. Viruses 10:351.
- 534 29. Burmeister AR, Sullivan RM, Gallie J, Lenski RE. 2021. Sustained coevolution of phage  
535 Lambda and *Escherichia coli* involves inner- as well as outer-membrane defences and  
536 counter-defences. Microbiology (Reading) 167. doi:10.1099/mic.0.001063.
- 537 30. Koskella B, Brockhurst MA. 2014. Bacteria–phage coevolution as a driver of ecological  
538 and evolutionary processes in microbial communities. FEMS Microbiol Rev 38:916-931.  
539 doi:10.1111/1574-6976.12072.
- 540 31. Oprea SF, Zaidi N, Donabedian SM, Balasubramaniam M, Hershberger E, Zervos MJ.  
541 2004. Molecular and clinical epidemiology of vancomycin-resistant *Enterococcus*  
542 *faecalis*. J Antimicrob Chemother 53:626-30. doi:10.1093/jac/dkh138.
- 543 32. Manson JM, Keis S, Smith JMB, Cook GM. 2003. A clonal lineage of VanA-type  
544 *Enterococcus faecalis* predominates in vancomycin-resistant Enterococci isolated in  
545 New Zealand. Antimicrob Agents Chemother 47:204-210. doi:10.1128/AAC.47.1.204-  
546 210.2003.

- 547 33. Jain M, Olsen HE, Paten B, Akeson M. 2016. The Oxford Nanopore MinION: delivery of  
548 nanopore sequencing to the genomics community. *Genome Biol* 17:239.  
549 doi:10.1186/s13059-016-1103-0.
- 550 34. Wick RR, Judd LM, Gorrie CL, Holt KE. 2017. Unicycler: Resolving bacterial genome  
551 assemblies from short and long sequencing reads. *PLoS Comput Biol* 13:e1005595.  
552 doi:10.1371/journal.pcbi.1005595.
- 553 35. De Coster W, D'Hert S, Schultz DT, Cruts M, Van Broeckhoven C. 2018. NanoPack:  
554 visualizing and processing long-read sequencing data. *Bioinformatics* 34:2666-2669.  
555 doi:10.1093/bioinformatics/bty149.
- 556 36. Wick RR, Schultz MB, Zobel J, Holt KE. 2015. Bandage: Interactive visualization of *de*  
557 *novo* genome assemblies. *Bioinformatics* 31:3350-2. doi:10.1093/bioinformatics/btv383.
- 558 37. Li H. 2018. Minimap2: Pairwise alignment for nucleotide sequences. *Bioinformatics*  
559 34:3094-3100. doi:10.1093/bioinformatics/bty191.
- 560 38. Aziz RK, Bartels D, Best AA, DeJongh M, Disz T, Edwards RA, Formsma K, Gerdes S,  
561 Glass EM, Kubal M, Meyer F, Olsen GJ, Olson R, Osterman AL, Overbeek RA, McNeil  
562 LK, Paarmann D, Paczian T, Parrello B, Pusch GD, Reich C, Stevens R, Vassieva O,  
563 Vonstein V, Wilke A, Zagnitko O. 2008. The RAST Server: Rapid Annotations using  
564 Subsystems Technology. *BMC Genomics* 9:75. doi:10.1186/1471-2164-9-75.
- 565 39. Li L, Stoeckert CJ, Jr., Roos DS. 2003. OrthoMCL: Identification of ortholog groups for  
566 eukaryotic genomes. *Genome Res* 13:2178-89. doi:10.1101/gr.1224503.

- 567 40. Hyatt D, Chen G-L, LoCascio PF, Land ML, Larimer FW, Hauser LJ. 2010. Prodigal:  
568 prokaryotic gene recognition and translation initiation site identification. BMC  
569 Bioinformatics 11:119. doi:10.1186/1471-2105-11-119.
- 570 41. Turner D, Kropinski AM, Adriaenssens EM. 2021. A roadmap for genome-based phage  
571 taxonomy. Viruses 13:506. doi:10.3390/v13030506.
- 572 42. Bolocan AS, Upadrasta A, Bettio PHA, Clooney AG, Draper LA, Ross RP, Hill C. 2019.  
573 Evaluation of phage therapy in the context of *Enterococcus faecalis* and its associated  
574 diseases. Viruses 11. doi:10.3390/v11040366.
- 575 43. Sullivan MJ, Petty NK, Beatson SA. 2011. Easyfig: A genome comparison visualizer.  
576 Bioinformatics 27:1009-10. doi:10.1093/bioinformatics/btr039.
- 577 44. Chatterjee A, Willett JLE, Nguyen UT, Monogue B, Palmer KL, Dunny GM, Duerkop BA.  
578 2020. Parallel genomics uncover novel enterococcal-bacteriophage interactions. mBio  
579 11:e03120-19. doi:doi:10.1128/mBio.03120-19.
- 580 45. Gao P, Pinkston KL, Bourgoigne A, Cruz MR, Garsin DA, Murray BE, Harvey BR. 2013.  
581 Library screen identifies *Enterococcus faecalis* CcpA, the catabolite control protein A, as  
582 an effector of Ace, a collagen adhesion protein linked to virulence. J Bacteriol 195:4761-  
583 4768. doi:doi:10.1128/JB.00706-13.
- 584 46. Srour B, Gervason S, Monfort B, D'Autréaux B. 2020. Mechanism of iron–sulfur cluster  
585 assembly: In the intimacy of iron and sulfur encounter. Inorganics 8:55.
- 586 47. Gao P, Tang Q, An X, Yan X, Liang D. 2011. Structure of HsdS subunit from  
587 *Thermoanaerobacter tengcongensis* sheds lights on mechanism of dynamic opening



- 588 and closing of type I methyltransferase. PLoS One 6:e17346.  
589 doi:10.1371/journal.pone.0017346.
- 590 48. Guerardel Y, Sadovskaya I, Maes E, Furlan S, Chapot-Chartier M-P, Mesnage S,  
591 Rigottier-Gois L, Serror P, Dunny GM. 2020. Complete structure of the enterococcal  
592 polysaccharide antigen (EPA) of vancomycin-resistant *Enterococcus faecalis* V583  
593 reveals that EPA decorations are teichoic acids covalently linked to a  
594 rhamnopolysaccharide backbone. mBio 11:e00277-20. doi:doi:10.1128/mBio.00277-20.
- 595 49. Turner AM, Lee JYH, Gorrie CL, Howden BP, Carter GP. 2021. Genomic insights into  
596 last-line antimicrobial resistance in multidrug-resistant *Staphylococcus* and vancomycin-  
597 resistant *Enterococcus*. Front Microbiol 12. doi:10.3389/fmicb.2021.637656.
- 598 50. Muscariello L, Marasco R, Felice MD, Sacco M. 2001. The functional *ccpA* gene is  
599 required for carbon catabolite repression in *Lactobacillus plantarum*. Appl Environ  
600 Microbiol 67:2903-2907. doi:doi:10.1128/AEM.67.7.2903-2907.2001.
- 601 51. Mojardín L, Salas M. 2016. Global transcriptional analysis of virus-host interactions  
602 between phage  $\phi$ 29 and *Bacillus subtilis*. J Virol 90:9293-9304.  
603 doi:doi:10.1128/JVI.01245-16.
- 604 52. Hadas H, Einav M, Fishov I, Zaritsky A. 1997. Bacteriophage T4 development depends  
605 on the physiology of its host *Escherichia coli*. Microbiology (Reading) 143 ( Pt 1):179-  
606 185. doi:10.1099/00221287-143-1-179.
- 607 53. Perry EB, Barrick JE, Bohannon BJM. 2015. The molecular and genetic basis of  
608 repeatable coevolution between *Escherichia coli* and bacteriophage T3 in a laboratory  
609 microcosm. PLoS ONE 10:e0130639. doi:10.1371/journal.pone.0130639.

610 54. Mizoguchi K, Morita M, Fischer CR, Yoichi M, Tanji Y, Unno H. 2003. Coevolution of  
611 bacteriophage PP01 and *Escherichia coli* O157:H7 in continuous culture. Appl Environ  
612 Microbiol 69:170-176. doi:doi:10.1128/AEM.69.1.170-176.2003.

613 55. Abel S, Abel zur Wiesch P, Davis BM, Waldor MK. 2015. Analysis of bottlenecks in  
614 experimental models of infection. PLoS Pathog 11:e1004823.  
615 doi:10.1371/journal.ppat.1004823.

616

617

618 **Figures legends and supplementary tables**

619 **Figure 1: Phi47 and phage VPE25 are genetically distinct. (A)** RAST genome annotation  
620 predicted the function of 16 open reading frames out of 101, and 2 tRNAs. Open reading frames  
621 encoding proteins of similar function are depicted in the same color. **(B)** Comparative analysis  
622 shows phage 47 belongs to orthocluster III. OrthoMCL was used to compare the phi47 genome  
623 to all publicly available enterococcal phage genomes. A phylogenetic proteomic tree was  
624 generated from OrthoMCL. Height is the average linkage of hierarchical clustering with 1000  
625 iterations using the Manhattan distance metric. 126 enterococcal phage genomes from the  
626 INPHARED database were used for comparison to phi47 (in red text). Distinct phage  
627 orthoclusters are represented by colored boxes. Roman numerals next to shaded boxes  
628 designate the orthocluster number. **(C)** EasyFig analysis shows three genes shared between  
629 phage 47 and VPE25. These genes are 67-100% identical at the nucleotide level.

630

631 **Figure 2: Phi47 kinetics differ in each experimental replicate.** Lines and bars of the same  
632 color represent *E. faecalis* SF28073 and phi47 titers, respectively. Bars represent the mean of 3  
633 technical replicates, while lines are a single biological replicate. Additional plaque assays were  
634 performed to identify when phi47 became undetectable in each culture.

635

636 **Supplemental table 1:** All mutations present in *E. faecalis* SF28073 challenged with VPE25.

637

638 **Supplemental table 2:** All mutations present in *E. faecalis* SF28073 challenged with phi47.

639

640 **Supplemental table 3:** All mutations present in phi47 coevolved with *E. faecalis* SF28073.

641

**A**

bioRxiv preprint doi: <https://doi.org/10.1101/2021.10.28.466302>; this version posted October 28, 2021. The copyright holder for this preprint (which was not certified by peer review) is the author/funder, who has granted bioRxiv a license to display the preprint in perpetuity. It is made available under aCC-BY-NC-ND 4.0 International license.

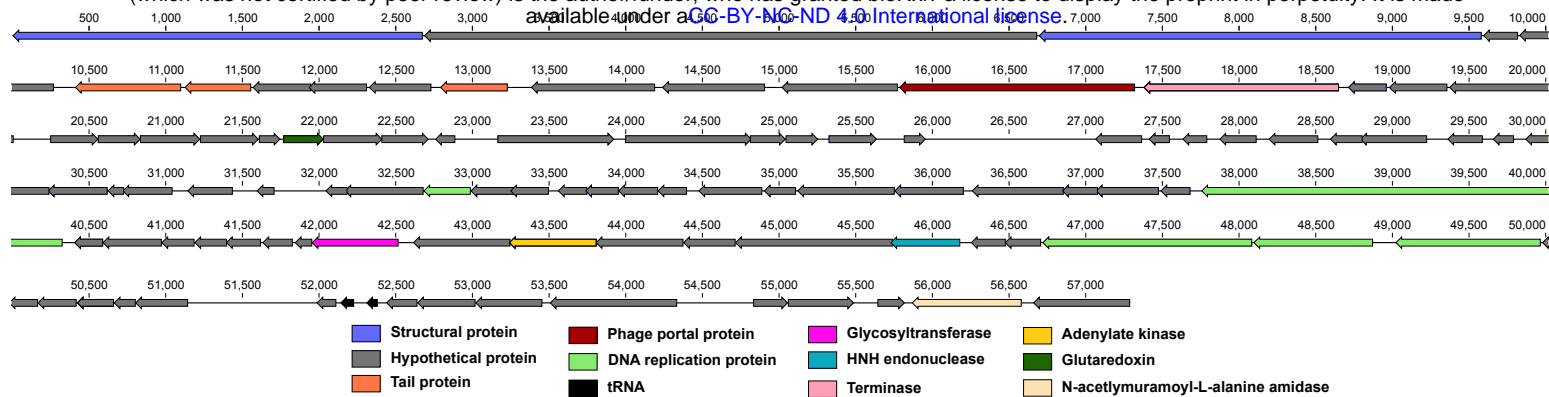

**B**

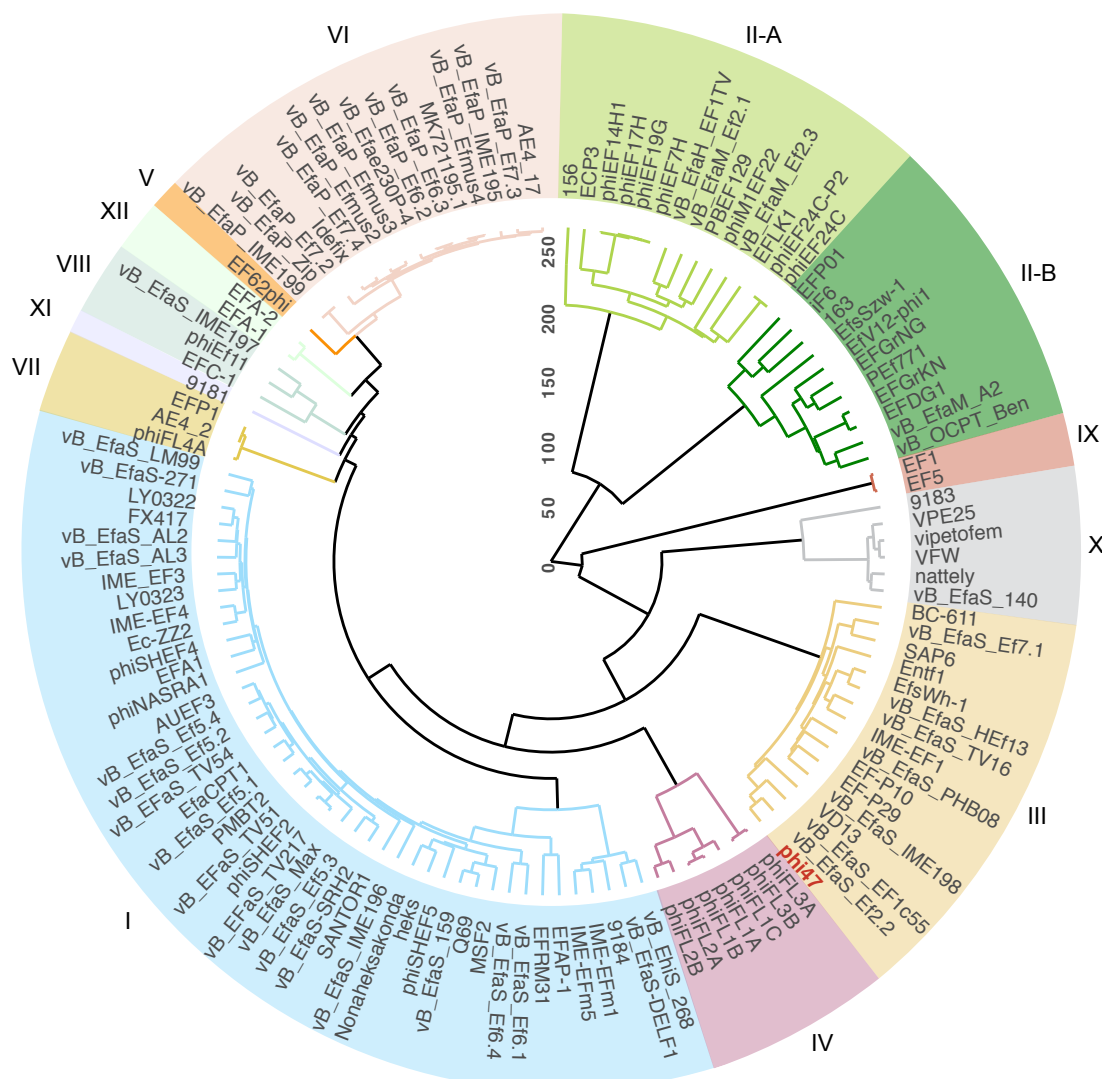

**C**

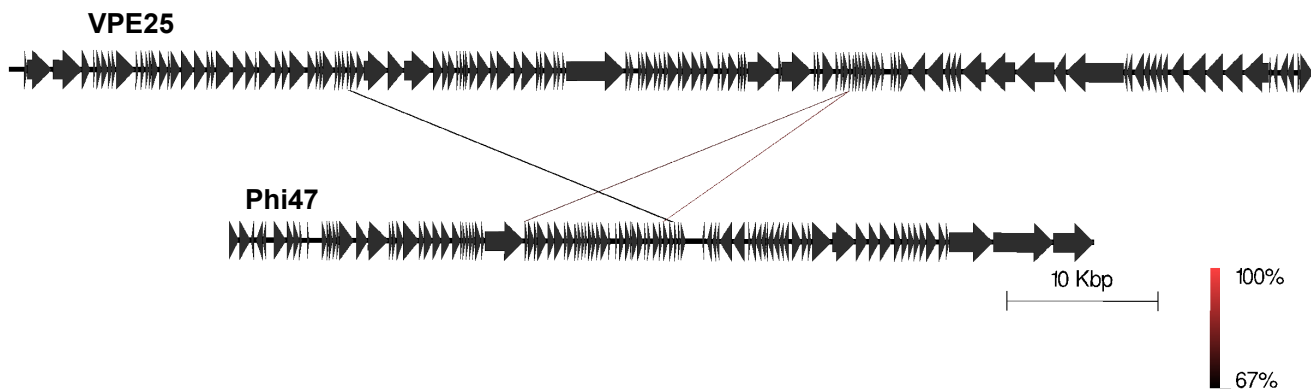

Source: https://www.biorxiv.org/content/biorxiv/early/2021/10/28/2021.10.28.466302.full.pdf
